# Supplementary material for: Enhanced up-conversion luminescence from NaYF4:Yb,Er nanocrystals by Gd3+ ions induced phase transformation and plasmonic Au nanosphere arrays
Source: Royal Society of Chemistry journal article supplement (doi:10.1039/c6ra20382e), 2016-01-01
Supplement: c6ra20382e1.pdf [file c6ra20382e1.pdf]

## Electronic Supplementary information

### **Enhanced up-conversion luminescence from NaYF<sub>4</sub>:Yb,Er nanocrystals by Gd<sup>3+</sup> ions induced phase transformation and plasmonic Au nanosphere arrays**

Yangqing Wu, Shaobing Lin, Wenyi Shao, Xiaowei Zhang, Jun Xu\*, Linwei Yu and Kunji Chen

National Laboratory of Solid State Microstructures and School of Electronic Science and Engineering and Collaborative Innovation Center of Advanced Microstructures, Nanjing University, Nanjing 210093, China  
E-mail: junxu@nju.edu.cn

## EDX spectra of NaYF<sub>4</sub> nanocrystals for Gd15 sample.

We have measured the EDX pattern of NaYF<sub>4</sub> nanocrystals to reveal the existence of doped elemental Gd. Fig. S1 shows the typical EDX spectra of sample Gd15 and the existence of Gd in the NaYF<sub>4</sub> nanocrystals can be clearly indicated.

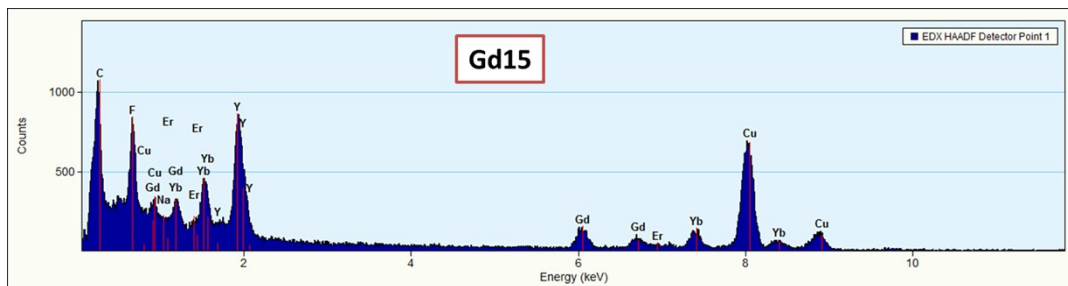

Fig. S1 the typical EDX spectra of NaYF<sub>4</sub> nanocrystals for Gd15 sample.

### FE-SEM images of NaYF<sub>4</sub> nanocrystals on the Au nanoarrays substrate

Cross-sectional and top view FE-SEM images of NaYF<sub>4</sub> nanocrystals on the Au nanoarrays substrate are shown in Fig. S2. It is shown that the thickness of NaYF<sub>4</sub> nanocrystals film is about 500 nm and the NaYF<sub>4</sub> nanocrystals film on the Au sphere structure is smooth with a compact structure.

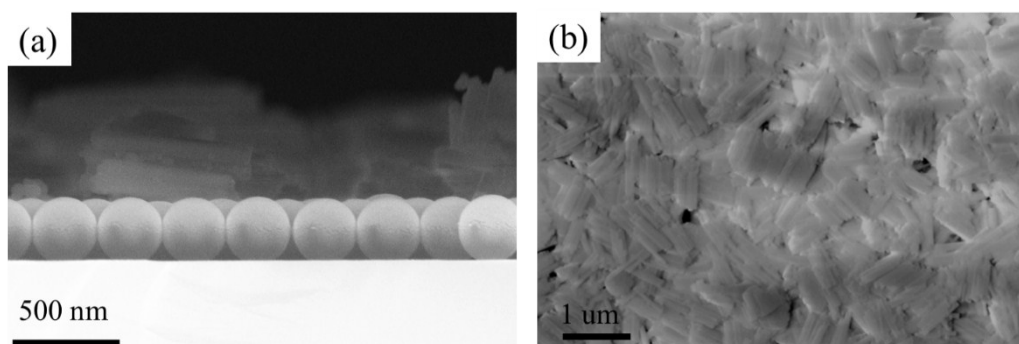

Fig. S2 Cross-sectional and top-view FE-SEM images of NaYF<sub>4</sub>:Yb,Er nanocrystals on Au nanoarrays, respectively.
